# Supplementary material
Source: PubMed Central journal article supplement (PMC3203662)
Supplement: cr20116x1.pdf [file cr20116x1.pdf]

Supplementary information, Figure S1

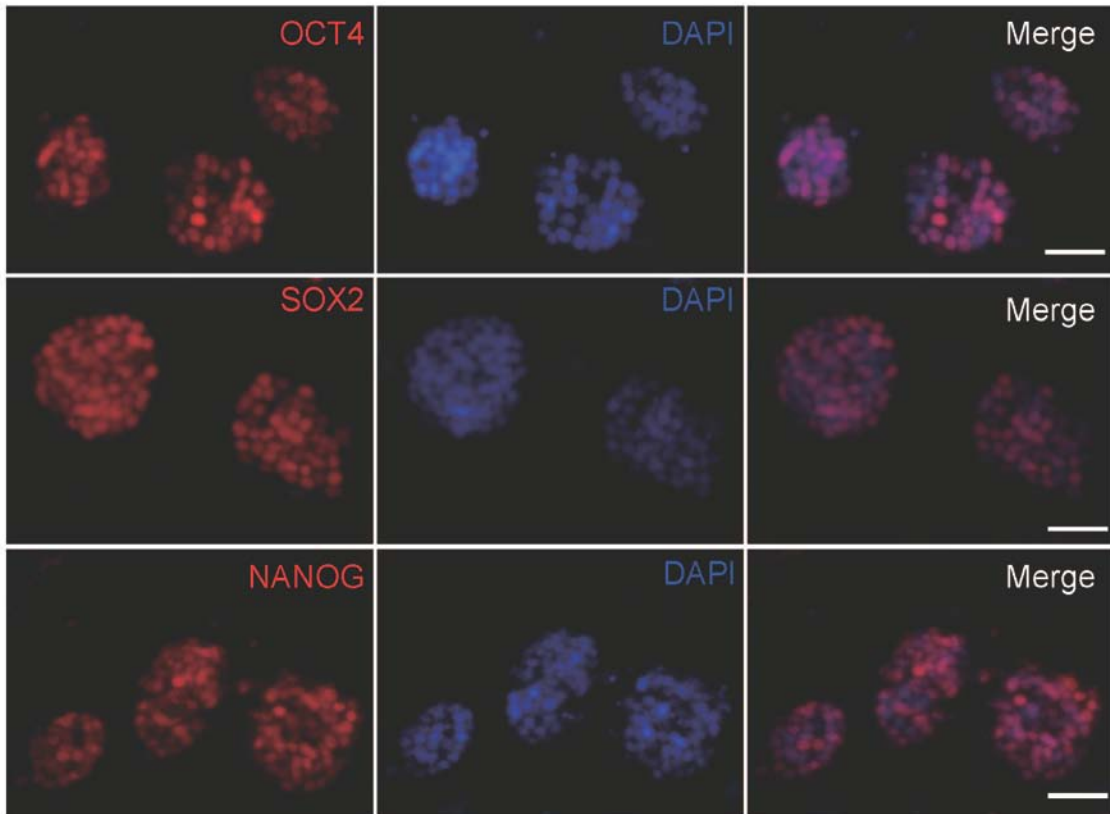

**Figure S1** Immunostaining of OCT4, SOX2 and NANOG in sheep iPS cells. Scale bars: 50 μm.
