# Supplementary material
Source: PubMed Central journal article supplement (PMC3203662)
Supplement: cr20116x2.pdf [file cr20116x2.pdf]

## Supplementary information, Table S1

**Table S1** Primers for RT-PCR

| <b>Gene Name</b> | <b>Sequence</b>            |
|------------------|----------------------------|
| Oct4 endo-f      | TACACTGTACTCTTCGGTCCCATT   |
| Oct4 endo-r      | AGCATCATTGAACTTCACCTTCCC   |
| Oct4 total-f     | ACATGTGTAAAGCTGCGGCC       |
| Oct4 total-r     | CCAGGTTGCCTCTCACTCGG       |
| Sox2 endo-f      | TACGGTAGGAGCTTTGCAGAAAGT   |
| Sox2 endo-r      | TGCACGTTTGCAACTGTCCTAAAT   |
| Sox2 total-f     | CAACGGCAGCTACAGCATGA       |
| Sox2 total -r    | CCTGGAGTGGGAAGAAGAGGT      |
| Nanog endo-f     | CAAGTATTTTCAGTTCCCAGCAGCA  |
| Nanog endo-r     | TCCCTCAAACCTGACACAGAAGGTA  |
| Nanog total -f   | GCAGAAATACCTCAGTCTCCAGCA   |
| Nanog total -r   | CAGGAGAGTTCACCAAACACCC     |
| TdGF1-f          | GATATCTCAGCAAACAAGTTTGCCA  |
| TdGF1-r          | GGCAGGTCCTCAGGTTATTGTTGC   |
| Eras-f           | CTAGAAAGTCACGTTTCAGGAGGGCC |
| Eras-r           | AAGAAGGAAACATCAAGAGGGAGGG  |
| Dax1-f           | AGTGCGTGAAGTACATCCAGGGACT  |
| Dax1-r           | CAGGGTGTTAGCGCTGATGAATCTC  |
| Dnmt3b-f         | GTGGTGCACTGAGCTAGAAAGGA    |

|               |                              |
|---------------|------------------------------|
| Dnmt3b-r      | CTCCAGGACCTCCCAAGCAG         |
| Dppa4-f       | CGGAGTCAGTAGGATCACAAGAGA     |
| Dppa4-r       | CACACTCAGGGCACAGCATATT       |
| Gdf3-f        | CATCGCCACCAGCTGTTTATCA       |
| Gdf3-r        | ACCCACACCCCACTCATCAA         |
| Afp-f         | TGTCAAGACAAATCGCAGAGTGCTG    |
| Afp-r         | GAAGAAAGTTGGTTGAAATCTCTCTCCT |
| Dcn-f         | AACAATATCTCTGCAATCGGCTC      |
| Dcn-r         | AGTTTCCAAGCTGAACAGCAGC       |
| Foxa2-f       | AGCACCCTACGCCTTCAAC          |
| Foxa2-r       | GGAGTACACGCCCTGGTAGTAG       |
| Fibronectin-f | AGATGATGAGCTGCACGTGTC        |
| Fibronectin-r | GCACCAAGATATTCCTTCTGCC       |
| Neurod-f      | TCTTTCAAACACGAACCGTCCG       |
| Neurod-r      | CGTGAAAGATGGCATTGAGCTG       |
| Nfh-f         | GAGTGAGGCTGGACCGACTG         |
| Nfh-r         | AGCTCAGAGCGCTGCCTCTC         |
| Actc1-f       | AAGCAAGAGTATGATGAGGCAGGCC    |
| Actc1-r       | TTTGTAGGTTGCAAGTCCTGATCTGG   |
| Kdr-f         | GGGTCCTGAAATCACGTTGCA        |
| Kdr-r         | AGTCTTCCTGTCCTGAGCAAAGC      |
| Myf5-f        | GAATGCCATCCGCTACATTGAGAG     |

|         |                         |
|---------|-------------------------|
| Myf5-r  | AATCCAGGTTGCTCTGAGTTGGT |
| Renin-f | GTTTGATCGGCGTAACAATCGC  |
| Renin-r | TGGTCCTCAAAGAAGGGAAGAG  |
| Gapdh-f | ACGGGAAGCTCACTGGCATGG   |
| Gapdh-r | GCCAGCCCCAGCATCGAAG     |
