# Supplementary material
Source: PubMed Central journal article supplement (PMC3203662)
Supplement: cr20116x3.pdf [file cr20116x3.pdf]

## Supplementary information, Table S2

**Table S2** PCR primers for Bisulfite genomic sequencing

| <b>Name</b> | <b>Sequence</b>                  | <b>Region(ATG+1)</b> |
|-------------|----------------------------------|----------------------|
| Nanog-1-OF  | AAAATATATAGGAGGGAAAATTTTT        | -4812bp~-4306bp      |
| Nanog-1-OR  | CAAAAATAAACAATTTAAACAAAA         | -4812bp~-4306bp      |
| Nanog-1-IF  | TGTTTAGGGATGTAATGTATATTTA        | -4812bp~-4306bp      |
| Nanog-1-IR  | TTTTCTATCCTCTAAAACATTTTAT        | -4812bp~-4306bp      |
| Nanog-2-OF  | TGTTTGGTTTGTTTTTAATATTTATTAT     | -4185bp~-3687bp      |
| Nanog-2-OR  | TCTCAAACATAACATATACATCAAATAT     | -4185bp~-3687bp      |
| Nanog-2-IF  | ATTTTATGAAATGGTTAGTTTTTTAA       | -4185bp~-3687bp      |
| Nanog-2-IR  | CAAATATAAAATTATTAAATATAATATTAATT | -4185bp~-3687bp      |
| Nanog-3-OF  | TGTGAAGTTTTAGTTATTGGATTAT        | -3168bp~-2646bp      |
| Nanog-3-OR  | CTAAACTTCCAAACTCTCAATTA          | -3168bp~-2646bp      |
| Nanog-3-IF  | TGTATTTTTTGTTTATAAATAAGGAA       | -3168bp~-2646bp      |
| Nanog-3-IR  | CAAACCTCAATTAACACTATTTAAT        | -3168bp~-2646bp      |
| Nanog-4-OF  | TGATTTAATGTATATGAGTTTGAGT        | -2555bp~-1923bp      |
| Nanog-4-OR  | ACCAACTAAATTTAACTCACAATAC        | -2555bp~-1923bp      |
| Nanog-4-IF  | TTTAATGTATATGAGTTTGAGTGG         | -2555bp~-1923bp      |
| Nanog-4-IR  | ATTTAACTCACAATACAAAATACC         | -2555bp~-1923bp      |
| Nanog-5-OF  | GAGAAGGGAATGGTAATTTATT           | -1435bp~-803bp       |
| Nanog-5-OR  | ATCCTAAAAACCTAATTAATCATCA        | -1435bp~-803bp       |
| Nanog-5-IF  | TGGGAAATTTTATTAATAGAGG           | -1435bp~-803bp       |

|            |                            |                |
|------------|----------------------------|----------------|
| Nanog-5-IR | AAACCATTACTATAAAAATTTTAAAA | -1435bp~-803bp |
| Nanog-6-OF | AAAATTAAGATAGAAGTTAGGTGGG  | -778bp~-122bp  |
| Nanog-6-OR | AAAACCAACCAATCCAATCTAA     | -778bp~-122bp  |
| Nanog-6-IF | AGATAGAAGTTAGGTGGGGGTTG    | -778bp~-122bp  |
| Nanog-6-IR | AATAAACTCAACCATACTTAACCC   | -778bp~-122bp  |
